# Supplementary material
Source: PubMed Central journal article supplement (PMC1765474)
Supplement: pnas_0609647103_5.pdf [file pnas_0609647103_5.pdf]

gtgctgctgaagttgcccgcaacagagagtggaaccaaccggtgataccacgatactat  
gactgagagtcaacgccatgagcggcctcatttcttattctgagttacaacagtcgca  
ccgctgtccggtagctccttccggtgggcgcgggcatgactatcgtcgcgcacttat  
gactgtcttctttatcatgcaactcgtaggacaggtgccggcagcgcaccaacagtcccc  
cggccacggggcctgccaccatacccacgccgaaacaagcgcctgcaccattatgttc  
cggatctgcatcgcaggatgctgctggctaccctgtggaacacctacatctgtattaac  
gaagcgcctaaccgtttttctcaggctctgggaggcagaataaatgatcatatcgtcaat  
tattacctccacggggagagcctgagcaaactggcctcaggcatttgagaagcacacgg  
tcacactgcttccggtagtcaataaacggtaaacagcaatagacataagcggctatt  
taacgacctgccctgaaccgacgaccgggtcgaatttgctttcgaatttctgccattc  
atccgcttattatcacttattcaggcgtagcaccaggcgtttaagggcaccaataactg  
ccttaaaaaaattacgccccgccctgccactcatcgcagtactggtgtaattcattaag  
cattctgccgacatggaagccatcacagacggcatgatgaacctgaatgccagcggca  
tcagcaccttgtcgccttgcgtataatattgcccatggtgaaaacggggcgagaag  
ttgtccatattggccacgtttaaatcaaaactggtgaaactcaccagggttggtga  
gacgaaaaacatatttcaataaacctttagggaataggccagggtttcaccgtaac  
acgccacatcttgcaatatatgtgtagaaactgccgaaatcgtcgtggtattcactc  
cagagcgtgaaaacgtttcagtttgctcatgaaaacgggtgtaacaaggggtgaact  
atcccatatcaccagctcaccttcttattgccatacggattccggatgagcattca  
tcaggcgggcaagaatgtgaataaaggccggataaaacttgtgcttatttttctttacg  
gtctttaaaaaggccgtaatatccagctgaacggtctggttataggtaacattgagcaac  
tgactgaaatgcctcaaaatgttctttacgatgccattgggatatatcaacggtggtat  
atccagtgattttttctccatttttagcttcccttagctcctgaaaatctcgataactca  
aaaaatacgcggtagtgatcttatttcttattggtgaaagttggaacctcttacgca  
aactattaactggcgaactacttactctagcttcccggcaacaattaatagactggatg  
gaggcggataaaagttgcaggaccacttctgcgctcggcccttccggctggctggtttat  
tgctgataaatctggagcgggtgagcgtgggtctcgcggtatcattgcagcactggggc  
cagatggtaagccctcccgtatcgtagttatctacacgacggggagtcaggcaactatg  
gatgaacgaaatagacagatcgtgagatagggtgcctcactgattaagcattggtaact  
gtcagaccaagttactcatataactttagattgatttacgcgcctgtagcggcgca  
ttaagcgcggcgggtgtggtggttacgcgcagcgtgaccgctacacttgccagcgcct  
agcgcctccttctcgtttcttcccttcccttctcgcacgcttcgcccgtttcccc  
gtcaagctctaaatcgggggctccctttagggttccgatttagtgctttacggcacctc  
gaccccaaaaaacttgatttgggtgatggttcacgtagtgggccatgccctgatagac  
ggtttttcgcctttgacgttggagtccacgttctttaatagtggactcttggtccaaa  
cttgaacaacactcaaccctatctcgggctattcttttgatttataagggattttgccg  
atctcggcctattggttaaaaaatgagctgatttaacaaaaatthaacgcgaattttaa  
caaatattaacgtttacaatttaaaaggatctagggtgaagatcctttttgataatctc  
atgaccaaaatcccttaacgtgagttttcgttccactgagcgtcagaccccgtagaaaa  
gatcaaaggatcttcttgagatccttttttctgcgcgtaatctgctgcttgcaaaaa  
aaaaaccaccgctaccagcgggtggtttggttgcgggatcaagagctaccaactctttt  
ccgaaggtaactggcttcagcagagcgcagataccaaatactgtccttctagtgtagcc  
gtagttaggccaccacttcaagaactctgtagcaccgcctacatacctcgtctgctaa  
tctgttaccagtggtgctgccagtgggcagataagtcgtgtcttaccgggttgactca  
agacgatagttaccggataaggcgcagcggctcgggctgaacggggggttcgtgcacaca  
gccagcttgagcgaacgacctacaccgaactgagatacctacagcgtgagctatgag  
aaagcgcacgcttcccgaaggagaaaggcggacaggtatccggtaagcggcagggtc  
ggaacaggagagcgcacgagggagcttccaggggaaacgcctggtatctttatagtcc

tgtcggggtttcgccacctctgacttgagcgtcgatTTTTgtgatgctcgtcagggggg  
ggagcctatggaaaaacgccagcaacgcggcctTTTTacggttcctggcctTTTgctgg  
cctTTTgctcacatgTtcttctcctgCGttatcccctgattctgtggataaccgtattac  
cgctTTTgagtgagctgataccgctcgcgcagccgaacgaccgagcgcagcgagtcag  
tgagcgcaggaagcgggaagagcgcctgatgcggatTTTTctccttacgcatctgtgcgg  
atttcacaccgcatatggtgcactctcagtacaatctgctctgatgccgcatagTTaag  
ccagtatacactccgctatcgctacgtgactgggtcatggctgcgccccgacaccgcg  
aacaccgcgctgacgcgcctgacgggcttgtctgctcccggcatccgcttacagacaag  
ctgtgaccgtctccgggagctgcatgtgtcagaggTTTTaccgctcatcaccgaaacgc  
gcgaggcagcaaggagatggcgcccaacagtccccggccacggggcctgccaccatac  
ccacgccgaaacaagcgcctcatgagcccgaagtggcgagccgatcttccccatcggtg  
atgtcggcgatataggcgccagcaaccgcacctgtggcgccggatgacggccacgat  
gcgtccggcgtagaggatctgctcatgTttgacagcttatcatcgatgcataatgtgcc  
tgtcaaatggacgaagcagggattctgcaaaccctatgctactccgtcaagccgtcaat  
tgtctgattcgttaccattatgacaacttgacggctacatcattcactTTTTcttcac  
aacgggcaggaactcgctcgggctggccccgggtgcattTTTTaataaccgcgagaaa  
tagagttgatcgtcaaaaccaacattgcgaccgacgggtggcgataggcatccgggtggt  
gctcaaaagcagcttcgcctggctgatacgttggctcctcgcgccagcttaagacgctaa  
tcctaactgctggcgaaaagatgtgacagacgcgacggcgacaagcaaacatgctgt  
gcgacgctggcgatatcaaaattgctgtctgccaggatcgctgatgtactgacaagc  
ctcgcgtaccgattatccatcggtggatggagcgcactcgTTaatcgcttccatgcgcc  
gcagtaacaattgctcaagcagatttatcgccagcagctccgaatagcgccttcccct  
tgccccggcgTTaatgatttgcccaaacaggctcgctgaaatgcggctggtgcgcttcatc  
cgggcgaaagaaccccgatttgccaaatattgacggccagTTaagccattcatgccagt  
aggcgcgcggacgaaagtaaaccactggtgataccattcgcgagcctccggatgacga  
ccgtagtgatgaatctctcctggcggggaacagcaaaatataccccggctcggcaaaaa  
ttctcgtccctgattTTTTcaccacccctgaccgcgaatgggtgagattgagaatataac  
cttccattcccagcggctcggctcgataaaaaaatcgagataaccgTTggcctcaatcggc  
gttaaaccgcaccagatgggcattaaacgagtatcccggcagcaggggatcattTTg  
cgcttcagccatactTTTTcatactcccggcattcagagaagaaaccaattgtccatatt  
gcatcagacattgccgtcactgcgtctTTTactggctcttctcgctaaccaaacggta  
accccgcttattaaaagcattctgtaacaaagcgggaccaaaagccatgacaaaaacgcg  
taacaaaagtgtctataatcacggcagaaaagtccacattgattatttgacggcgtca  
cactTTgctatgccatagcattTTTTatccataagattagcggatcctacctgacgctt  
ttatcgcaactctctactgTTTctccatacccgTTTTTTTTgggctagcgaattcgagct  
cggccacgaaggccaggagtgaaacg ATG TCT AAA GGT GAA GAA TTA TTC  
ACT GGT GTT GTC CCA ATT TTG GTT GAA TTA GAT GGT GAT GTT AAT  
GGT CAC AAA TTT TCT GTC TCC GGT GAA GGT GAA GGT GAT GCT ACG  
TAC GGT AAA TTG ACC TTA AAA TTT ATT TGT ACT ACT GGT AAA TTG  
CCA GTT CCA TAATGCATGACCTCGACTCCGCTGAGC AGA TAC CCA GAT CAT  
ATG AAA CAA CAT GAC TTT TTC AAG TCT GCC ATG CCA GAA GGT TAT  
GTT CAA GAA AGA ACT ATT TTT TTC AAA GAT GAC GGT AAC TAC AAG  
ACC AGA GCT GAA GTC AAG TTT GAA GGT GAT ACC TTA GTT AAT AGA  
ATC GAA TTA AAA GGT ATT GAT TTT AAA GAA GAT GGT AAC ATT TTA  
GGT CAC AAA TTG GAA TAC AAC TAT AAC TCT CAC AAT GTT TAC ATC  
ATG GCT GAC AAA CAA AAG AAT GGT ATC AAA GTT AAC TTC AAA ATT  
AGA CAC AAC ATT GAA GAT GGT TCT GTT CAA TTA GCT GAC CAT TAT  
CAA CAA AAT ACT CCA ATT GGT GAT GGT CCA GTC TTG TTA CCA GAC

AAC CAT TAC TTA TCC ACT CAA TCT GCC TTA TCC AAA GAT CCA AAC  
GAA AAG AGA GAC CAC ATG GTC TTG TTA GAA TTT GTT ACT GCT GCT  
GGT ATT ACC CAT GGT ATG GAT GAA TTG TAC AAA TAA

ggccaaggtggccggtacccggggatcctctagagtcgacctgcaggcatgcaagcttg  
gctgttttggcggatgagagaagatcttcagcctgatacagattaaatcagaacgcaga  
agcggctctgataaaacagaatcttcctggcggcagtagcgcgggtggcccacctgacc  
catgccgaactcagaagtgaacgccgtagcgcggatggttagtgtgggggtctcccatg  
cgagagtagggaactgccaggcatcaataaaacgaaaggctcagtcgaaagactgggc  
ctttcgttttatctgtttgttgcggtgaacgctctcctgagtaggacaaatccgccgg  
gagcggatctgaacggttgcgaagcaacggcccgagggtggcgggcaggacgcccgcca  
taaactgccaggcatcaattaagcagaaggccatcctgacggatggcctttttgcggt  
tctacaaactctttgtttatcttctaaatacattcaaatatgtatccgctcatgaga  
caataaccctgataaatgcttcaataatattgaaaaaggaagagtatgagattcaaca  
tttccgtgctgcccttattcccttttttgcggcattttgccttctgtttttgctcacc  
cagaaacgctgggtgaaagtaaaagatgctgaagatcagttgggtgcacgagtggttac  
atcgaactggatctcaacagcggtaagatccttgagagttttcgccccgaagaacgtt  
tccaatgatgagcacttttaaagttctgctatgtggcgcgggtattatcccgtgttgacg  
ccgggcaagagcaactcggtcgccgcatacactattctcagaatgacttgggtgagtac  
tcaccagtcacagaaaagcatcttacggatggcatgacagtaagagaattatgcagtgc  
tgccataaccatgagtgataaactgcggccaacttacttctgacaacgatcggaggac  
cgaaggagctaaccgcttttttgcacaacatgggggatcatgtaactcgccttgatcgt  
tggaaccggagctgaatgaagccatacacaacgacgagcgtgacaccacgatgcctgc  
agcaatggcaacaacggttc
