# Supplementary material
Source: PubMed Central journal article supplement (PMC1765474)

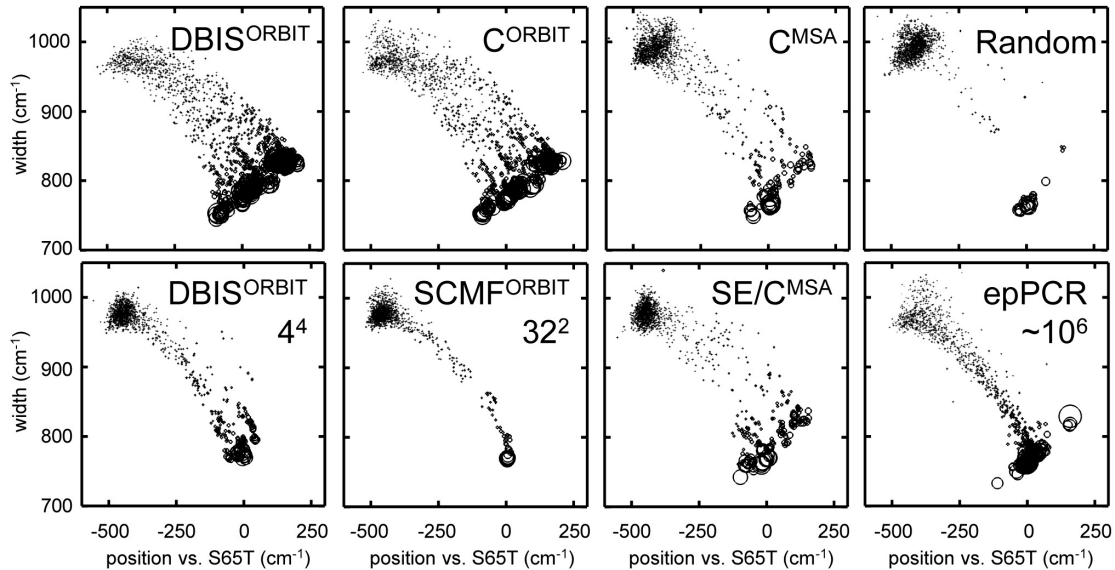

Supplement: pnas_0609647103_1.pdf [file pnas_0609647103_1.pdf]

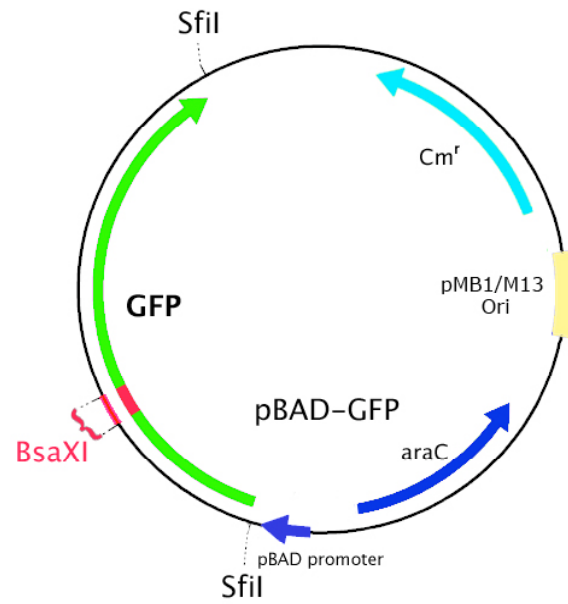

5' - TAATGCATGACCTCGACTCCGCTGAGCAGA - 3'  
 3' - GGTATTACGTACTGGAGCTGAGGCGACTCG - 5'

Supplement: pnas_0609647103_2.pdf [file pnas_0609647103_2.pdf]

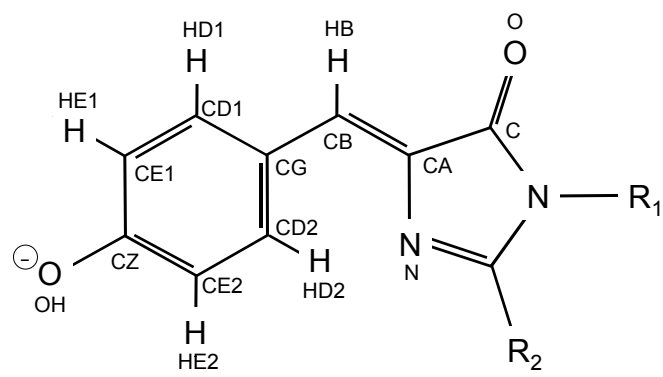

Supplement: pnas_0609647103_3.pdf [file pnas_0609647103_3.pdf]

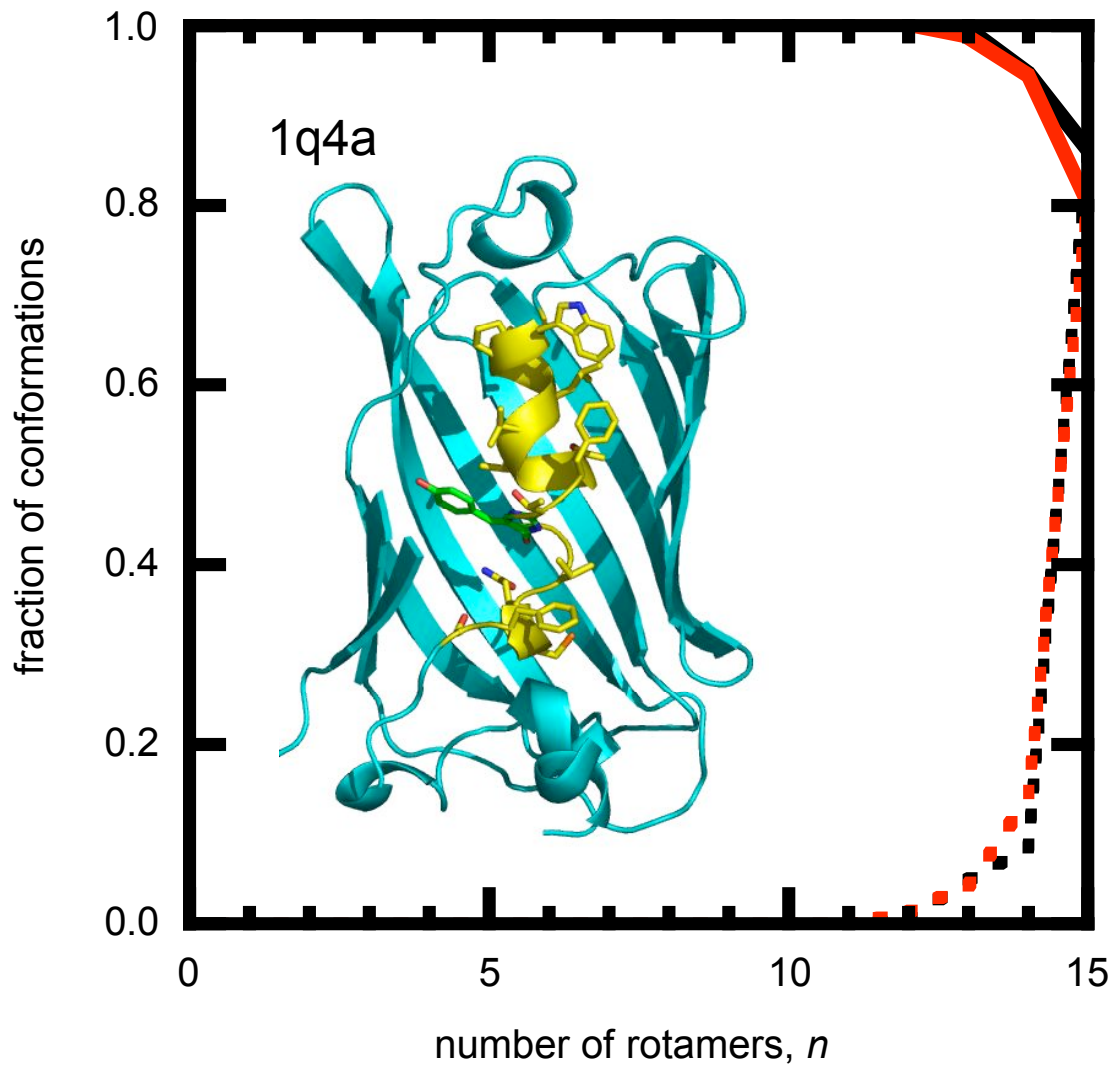

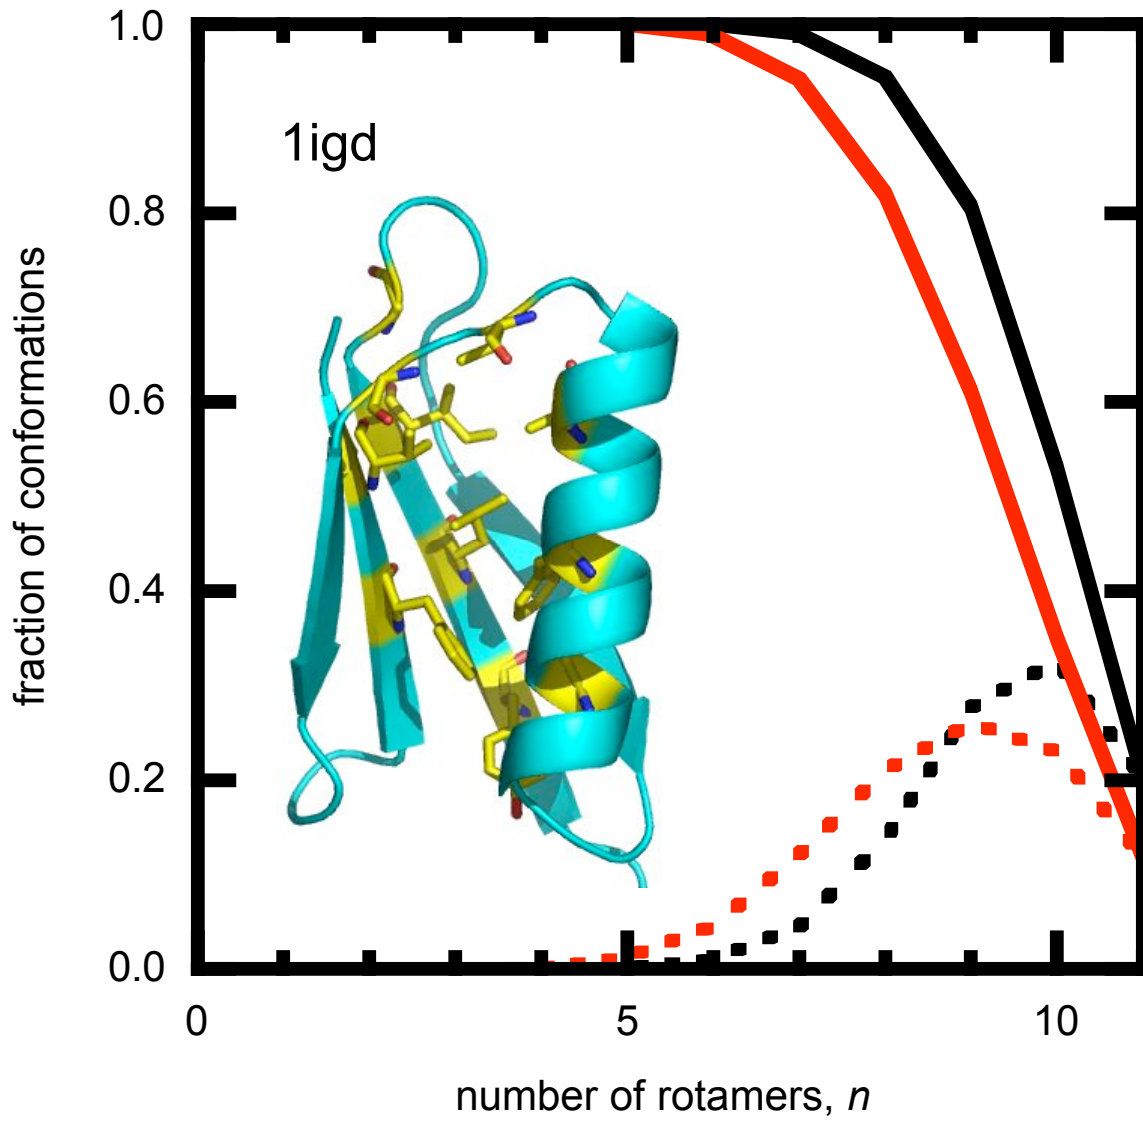

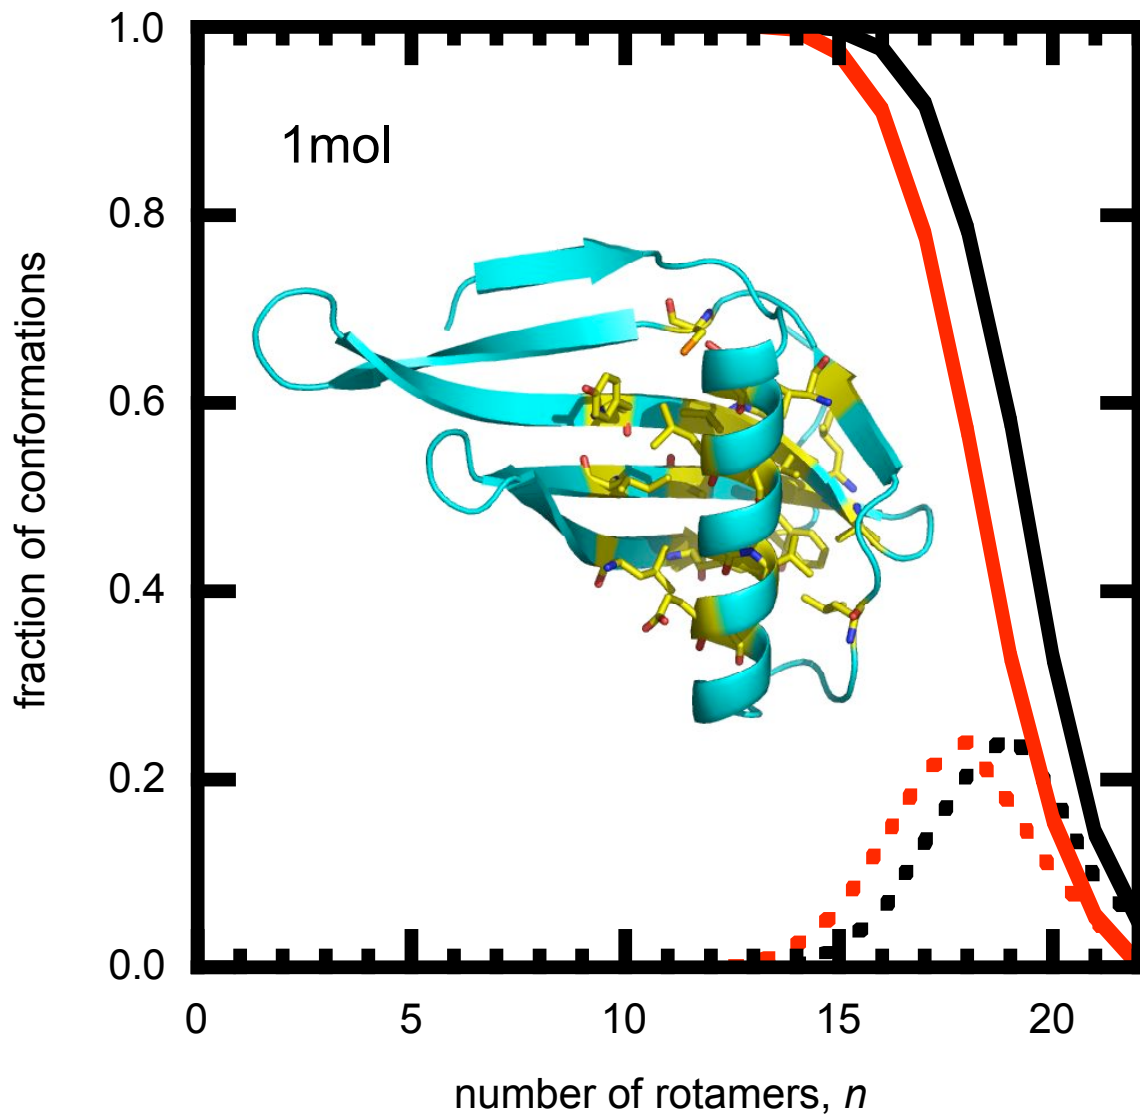

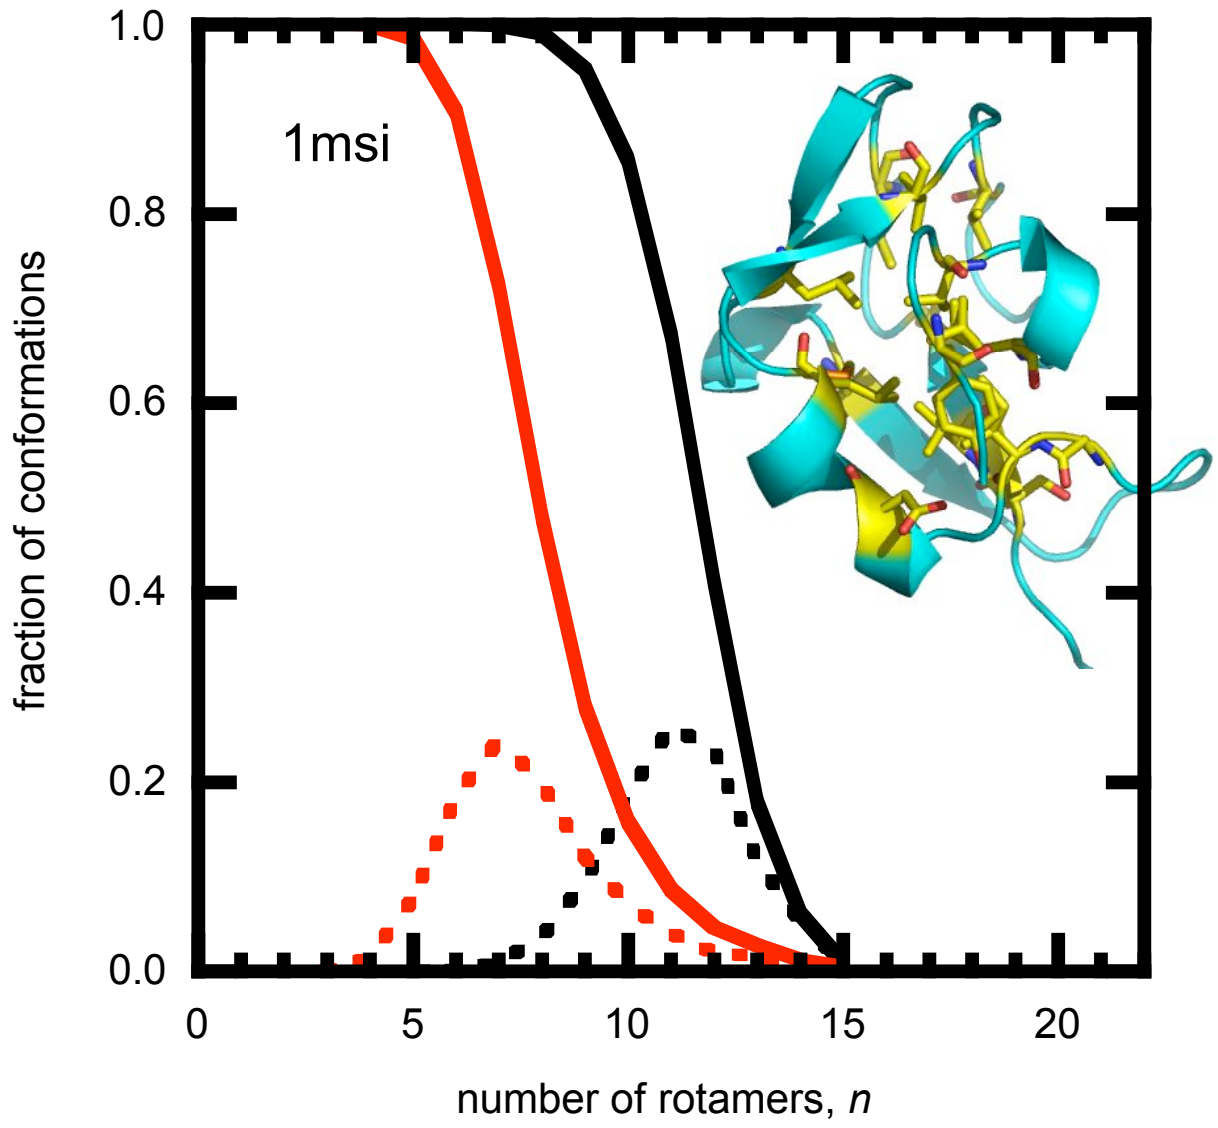

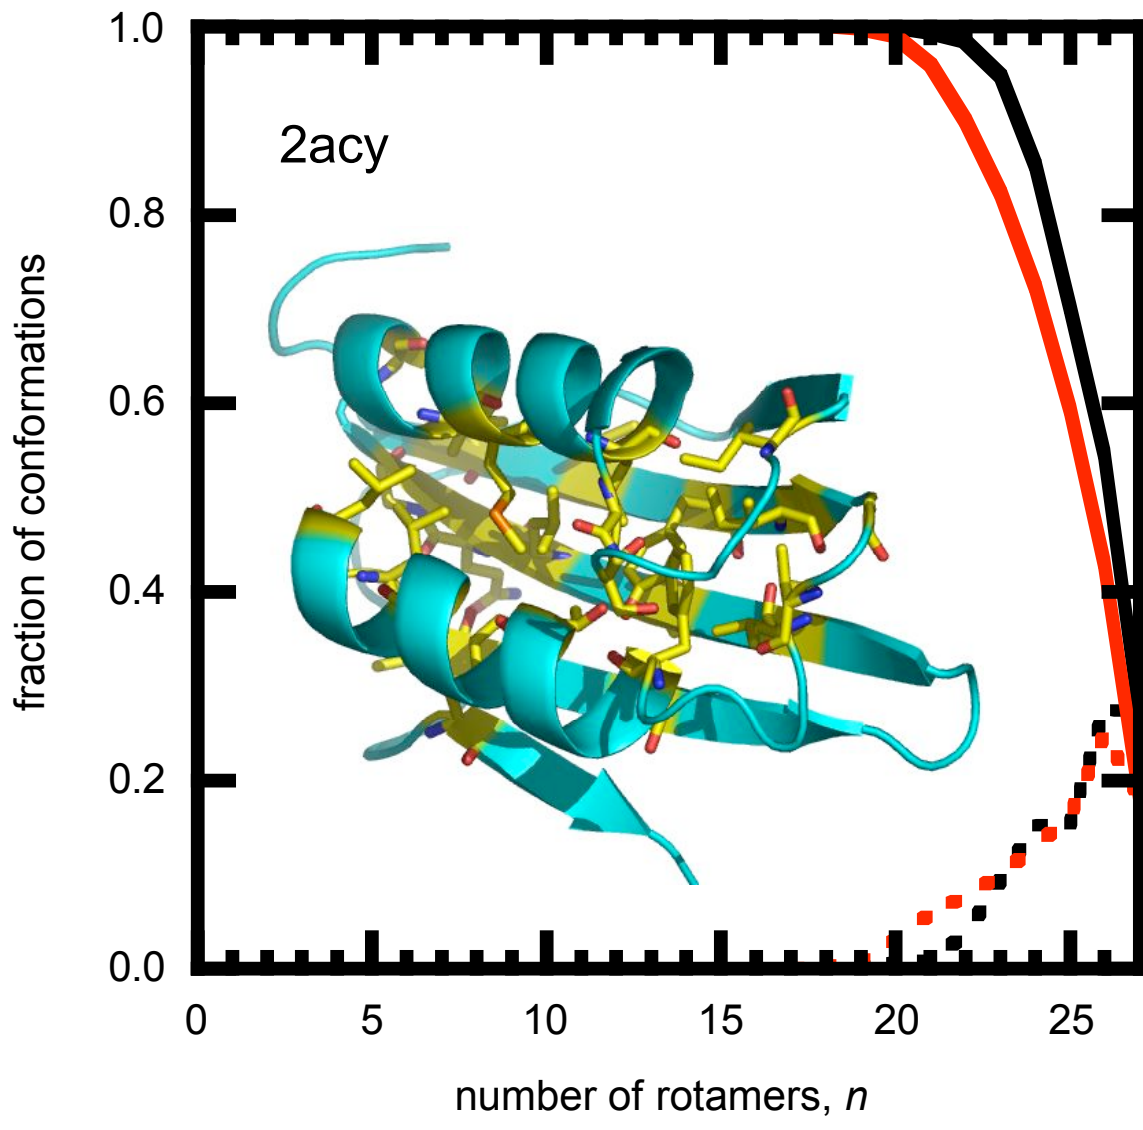

Supplement: pnas_0609647103_4.pdf [file pnas_0609647103_4.pdf]
